# Supplementary material
Source: PubMed Central journal article supplement (PMC5519365)
Supplement: 10.1074_M117.793877_jbc.M117.793877-1.pdf [file 10.1074_M117.793877_jbc.M117.793877-1.pdf]

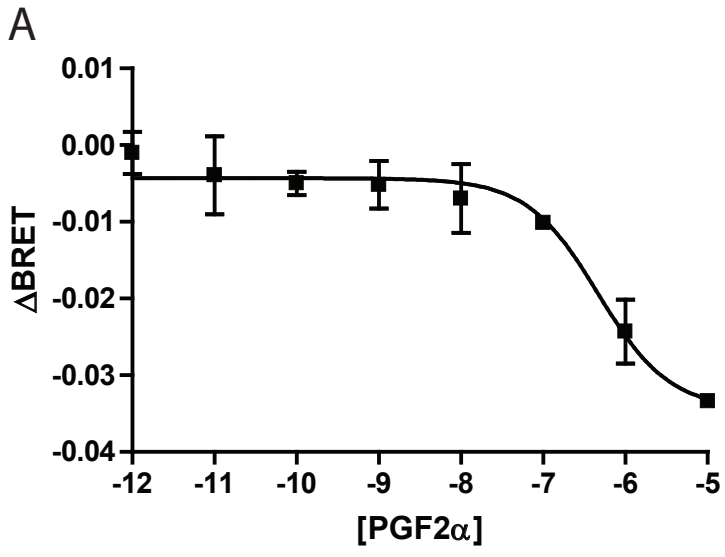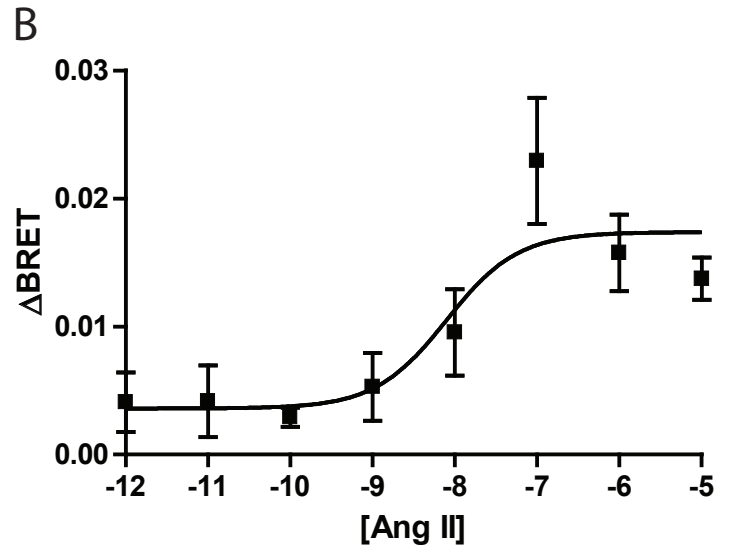

**Supplemental Figure 1. The FP-ICL3 P4-RlucII sensor reports ligand concentration-dependent conformational changes.** HEK 293 SL cells transfected with FP-ICL3 P4-RlucII and AT1R-WT were stimulated with increasing concentrations of A) PGF2 $\alpha$  or B) Ang II. Mean  $\pm$  SD was plotted for 3 technical replicates from 1 experiment. Curves were fit with sigmoidal dose-response equations in Graphpad Prism. For FP stimulation, EC<sub>50</sub> was 4.64x10<sup>-7</sup> while for Ang II, the EC<sub>50</sub> was 7.89x10<sup>-9</sup>).
